# Supplementary material for: Automated High-Definition MRI Processing Routine Robustly Detects Longitudinal Morphometry Changes in Alzheimer’s Disease Patients
Source: Front Aging Neurosci. 2022 Jun 7;14:832828. doi: 10.3389/fnagi.2022.832828 (PMC9211026; doi:10.3389/fnagi.2022.832828)
Supplement: Supplementary Table 2 — 360 Regions of Interests as defined by the HCP MMP 1.0 atlas. Each row contains the abbreviation and full name for each ROI as well as hemisphere and a part of information derived from neurosurgical literature (Baker et al., 2018). [file Table_2.XLSX]

## Sheet: BioXM report
ROI		Preferred Name	Hemisphere	Part of	Brain Atlas
L_V1		Primary Visual Cortex	Left	occipital lobe	HCP MMP 1.0
L_MST		Medial Superior Temporal Area	Left	occipital lobe	HCP MMP 1.0
L_V6		Sixth Visual Area	Left	occipital lobe	HCP MMP 1.0
L_V2		Second Visual Area	Left	occipital lobe	HCP MMP 1.0
L_V3		Third Visual Area	Left	occipital lobe	HCP MMP 1.0
L_V4		Fourth Visual Area	Left	occipital lobe	HCP MMP 1.0
L_V8		Eighth Visual Area	Left	occipital lobe	HCP MMP 1.0
L_4		Primary Motor Cortex	Left	motor, premotor, and somatosensory cortices	HCP MMP 1.0
L_3b		Primary Sensory Cortex	Left	motor, premotor, and somatosensory cortices	HCP MMP 1.0
L_FEF		Frontal Eye Fields	Left	motor, premotor, and somatosensory cortices	HCP MMP 1.0
L_55b		Area 55b	Left	motor, premotor, and somatosensory cortices	HCP MMP 1.0
L_V3A		Area V3A	Left	occipital lobe	HCP MMP 1.0
L_RSC		RetroSplenial Complex	Left	posterior cingulate cortex, medial parietal lobe, and parieto-occipital sulcus	HCP MMP 1.0
L_POS2		Parieto-Occipital Sulcus Area 2	Left	posterior cingulate cortex, medial parietal lobe, and parieto-occipital sulcus	HCP MMP 1.0
L_V7		Seventh Visual Area	Left	occipital lobe	HCP MMP 1.0
L_IPS1		IntraParietal Sulcus Area 1	Left	lateral parietal lobe	HCP MMP 1.0
L_FFC		Fusiform Face Complex	Left	occipital lobe	HCP MMP 1.0
L_V3B		Area V3B	Left	occipital lobe	HCP MMP 1.0
L_LO1		Area Lateral Occipital 1	Left	occipital lobe	HCP MMP 1.0
L_LO2		Area Lateral Occipital 2	Left	occipital lobe	HCP MMP 1.0
L_PIT		Posterior InferoTemporal Complex	Left	occipital lobe	HCP MMP 1.0
L_MT		Middle Temporal Area	Left	occipital lobe	HCP MMP 1.0
L_A1		Primary Auditory Cortex	Left	insula and opercular cortex	HCP MMP 1.0
L_PSL		PeriSylvian Language Area	Left	insula and opercular cortex	HCP MMP 1.0
L_SFL		Superior Frontal Language Area	Left	motor, premotor, and somatosensory cortices	HCP MMP 1.0
L_PCV		PreCuneus Visual Area	Left	posterior cingulate cortex, medial parietal lobe, and parieto-occipital sulcus	HCP MMP 1.0
L_STV		Superior Temporal Visual Area	Left	insula and opercular cortex	HCP MMP 1.0
L_7Pm		Medial Area 7P	Left	lateral parietal lobe	HCP MMP 1.0
L_7m		Area 7m	Left	posterior cingulate cortex, medial parietal lobe, and parieto-occipital sulcus	HCP MMP 1.0
L_POS1		Parieto-Occipital Sulcus Area 1	Left	posterior cingulate cortex, medial parietal lobe, and parieto-occipital sulcus	HCP MMP 1.0
L_23d		Area 23d	Left	posterior cingulate cortex, medial parietal lobe, and parieto-occipital sulcus	HCP MMP 1.0
L_v23ab		Area ventral 23 a+b	Left	posterior cingulate cortex, medial parietal lobe, and parieto-occipital sulcus	HCP MMP 1.0
L_d23ab		Area dorsal 23 a+b	Left	posterior cingulate cortex, medial parietal lobe, and parieto-occipital sulcus	HCP MMP 1.0
L_31pv		Area 31p ventral	Left	posterior cingulate cortex, medial parietal lobe, and parieto-occipital sulcus	HCP MMP 1.0
L_5mv		Area 5m ventral	Left	motor, premotor, and somatosensory cortices	HCP MMP 1.0
L_5L		Area 5L	Left	motor, premotor, and somatosensory cortices	HCP MMP 1.0
L_24dd		Dorsal Area 24d	Left	anterior cingulate regions	HCP MMP 1.0
L_7AL		Lateral Area 7A	Left	lateral parietal lobe	HCP MMP 1.0
L_SCEF		Supplementary and Cingulate Eye Field	Left	medial frontal lobe, anterior cingulate gyrus, and orbitofrontal cortex	HCP MMP 1.0
L_6ma		Area 6m anterior	Left	motor, premotor, and somatosensory cortices	HCP MMP 1.0
L_7Am		Medial Area 7A	Left	lateral parietal lobe	HCP MMP 1.0
L_7Pl		Lateral Area 7P	Left	lateral parietal lobe	HCP MMP 1.0
L_7PC		Area 7PC	Left	lateral parietal lobe	HCP MMP 1.0
L_LIPv		Area Lateral IntraParietal ventral	Left	lateral parietal lobe	HCP MMP 1.0
L_VIP		Ventral IntraParietal Complex	Left	lateral parietal lobe	HCP MMP 1.0
L_MIP		Medial IntraParietal Area	Left	lateral parietal lobe	HCP MMP 1.0
L_1		Area 1	Left	motor, premotor, and somatosensory cortices	HCP MMP 1.0
L_2		Area 2	Left	motor, premotor, and somatosensory cortices	HCP MMP 1.0
L_3a		Area 3a	Left	motor, premotor, and somatosensory cortices	HCP MMP 1.0
L_p24pr		Area Posterior 24 prime	Left	anterior cingulate regions	HCP MMP 1.0
L_8BM		Area 8BM	Left	medial frontal lobe, anterior cingulate gyrus, and orbitofrontal cortex	HCP MMP 1.0
L_10r		Area 10r	Left	medial frontal lobe, anterior cingulate gyrus, and orbitofrontal cortex	HCP MMP 1.0
L_47m		Area 47m	Left	medial frontal lobe, anterior cingulate gyrus, and orbitofrontal cortex	HCP MMP 1.0
L_8Av		Area 8Av	Left	lateral frontal lobe	HCP MMP 1.0
L_8Ad		Area 8Ad	Left	lateral frontal lobe	HCP MMP 1.0
L_9m		Area 9 Middle	Left	medial frontal lobe, anterior cingulate gyrus, and orbitofrontal cortex	HCP MMP 1.0
L_9p		Area 9 Posterior	Left	lateral frontal lobe	HCP MMP 1.0
L_10d		Area 10d	Left	lateral frontal lobe	HCP MMP 1.0
L_8C		Area 8C	Left	lateral frontal lobe	HCP MMP 1.0
L_44		Area 44	Left	lateral frontal lobe	HCP MMP 1.0
L_45		Area 45	Left	lateral frontal lobe	HCP MMP 1.0
L_47l		Area 47l (47 lateral)	Left	lateral frontal lobe	HCP MMP 1.0
L_a47r		Area anterior 47r	Left	lateral frontal lobe	HCP MMP 1.0
L_6r		Rostral Area 6	Left	motor, premotor, and somatosensory cortices	HCP MMP 1.0
L_IFJa		Area IFJa	Left	lateral frontal lobe	HCP MMP 1.0
L_IFJp		Area IFJp	Left	lateral frontal lobe	HCP MMP 1.0
L_IFSp		Area IFSp	Left	lateral frontal lobe	HCP MMP 1.0
L_IFSa		Area IFSa	Left	lateral frontal lobe	HCP MMP 1.0
L_46		Area 46	Left	lateral frontal lobe	HCP MMP 1.0
L_a9-46v		Area anterior 9-46v	Left	lateral frontal lobe	HCP MMP 1.0
L_9a		Area 9 anterior	Left	lateral frontal lobe	HCP MMP 1.0
L_a10p		Area anterior 10p	Left	lateral frontal lobe	HCP MMP 1.0
L_10pp		Polar 10p	Left	lateral frontal lobe	HCP MMP 1.0
L_11l		Area 11l	Left	medial frontal lobe, anterior cingulate gyrus, and orbitofrontal cortex	HCP MMP 1.0
L_13l		Area 13l	Left	medial frontal lobe, anterior cingulate gyrus, and orbitofrontal cortex	HCP MMP 1.0
L_OFC		Orbital Frontal Complex	Left	medial frontal lobe, anterior cingulate gyrus, and orbitofrontal cortex	HCP MMP 1.0
L_47s		Area 47s	Left	lateral frontal lobe	HCP MMP 1.0
L_LIPd		Area Lateral IntraParietal dorsal	Left	lateral parietal lobe	HCP MMP 1.0
L_6a		Area 6 anterior	Left	motor, premotor, and somatosensory cortices	HCP MMP 1.0
L_i6-8		Inferior 6-8 Transitional Area	Left	lateral frontal lobe	HCP MMP 1.0
L_s6-8		Superior 6-8 Transitional Area	Left	lateral frontal lobe	HCP MMP 1.0
L_OP1		Area OP1/SII	Left	insula and opercular cortex	HCP MMP 1.0
L_OP2-3		Area OP2-3/VS	Left	insula and opercular cortex	HCP MMP 1.0
L_52		Area 52	Left	insula and opercular cortex	HCP MMP 1.0
L_RI		RetroInsular Cortex	Left	insula and opercular cortex	HCP MMP 1.0
L_PFcm		Area PFcm	Left	insula and opercular cortex	HCP MMP 1.0
L_PoI2		Posterior Insular Area 2	Left	insula and opercular cortex	HCP MMP 1.0
L_TA2		Area TA2	Left	insula and opercular cortex	HCP MMP 1.0
L_FOP4		Frontal OPercular Area 4	Left	insula and opercular cortex	HCP MMP 1.0
L_MI		Middle Insular Area	Left	insula and opercular cortex	HCP MMP 1.0
L_Pir		Pirform Cortex	Left	insula and opercular cortex	HCP MMP 1.0
L_AVI		Anterior Ventral Insular Area	Left	insula and opercular cortex	HCP MMP 1.0
L_AAIC		Anterior Agranular Insula Complex	Left	insula and opercular cortex	HCP MMP 1.0
L_FOP3		Frontal OPercular Area 3	Left	insula and opercular cortex	HCP MMP 1.0
L_FOP2		Frontal OPercular Area 2	Left	insula and opercular cortex	HCP MMP 1.0
L_PFt		Area PFt	Left	lateral parietal lobe	HCP MMP 1.0
L_AIP		Anterior IntraParietal Area	Left	lateral parietal lobe	HCP MMP 1.0
L_EC		Entorhinal Cortex	Left	temporal lobe	HCP MMP 1.0
L_PreS		PreSubiculum	Left	temporal lobe	HCP MMP 1.0
L_ProS		ProStriate Area	Left	posterior cingulate cortex, medial parietal lobe, and parieto-occipital sulcus	HCP MMP 1.0
L_PeEc		Perirhinal Ectorhinal Cortex	Left	temporal lobe	HCP MMP 1.0
L_STGa		Area STGa	Left	insula and opercular cortex	HCP MMP 1.0
L_PBelt		ParaBelt Complex	Left	insula and opercular cortex	HCP MMP 1.0
L_A5		Auditory 5 Complex	Left	insula and opercular cortex	HCP MMP 1.0
L_PHA1		ParaHippocampal Area 1	Left	temporal lobe	HCP MMP 1.0
L_PHA3		ParaHippocampal Area 3	Left	temporal lobe	HCP MMP 1.0
L_STSda		Area STSd anterior	Left	temporal lobe	HCP MMP 1.0
L_STSdp		Area STSd posterior	Left	temporal lobe	HCP MMP 1.0
L_STSvp		Area STSv posterior	Left	temporal lobe	HCP MMP 1.0
L_TGd		Area TG dorsal	Left	temporal lobe	HCP MMP 1.0
L_TE1a		Area TE1 anterior	Left	temporal lobe	HCP MMP 1.0
L_TE1p		Area TE1 posterior	Left	temporal lobe	HCP MMP 1.0
L_TE2a		Area TE2 anterior	Left	temporal lobe	HCP MMP 1.0
L_TF		Area TF	Left	temporal lobe	HCP MMP 1.0
L_TE2p		Area TE2 posterior	Left	temporal lobe	HCP MMP 1.0
L_PHT		Area PHT	Left	temporal lobe	HCP MMP 1.0
L_PH		Area PH	Left	occipital lobe	HCP MMP 1.0
L_TPOJ1		Area TemporoParietoOcci pital Junction 1	Left	lateral parietal lobe	HCP MMP 1.0
L_TPOJ2		Area TemporoParietoOcci pital Junction 2	Left	lateral parietal lobe	HCP MMP 1.0
L_TPOJ3		Area Temporo-Parieto-Occipital Junction 3	Left	lateral parietal lobe	HCP MMP 1.0
L_DVT		Dorsal Transitional Visual Area	Left	posterior cingulate cortex, medial parietal lobe, and parieto-occipital sulcus	HCP MMP 1.0
L_PGp		Area PGp	Left	lateral parietal lobe	HCP MMP 1.0
L_IP2		Area IntraParietal 2	Left	lateral parietal lobe	HCP MMP 1.0
L_IP1		Area IntraParietal 1	Left	lateral parietal lobe	HCP MMP 1.0
L_IP0		Area IntraParietal 0	Left	lateral parietal lobe	HCP MMP 1.0
L_PF		Area PF Complex	Left	lateral parietal lobe	HCP MMP 1.0
L_PFm		Area PFm Complex	Left	lateral parietal lobe	HCP MMP 1.0
L_PGi		Area PGi	Left	lateral parietal lobe	HCP MMP 1.0
L_PGs		Area PGs	Left	lateral parietal lobe	HCP MMP 1.0
L_V6A		Area V6A	Left	occipital lobe	HCP MMP 1.0
L_VMV1		VentroMedial Visual Area 1	Left	occipital lobe	HCP MMP 1.0
L_VMV3		VentroMedial Visual Area 3	Left	occipital lobe	HCP MMP 1.0
L_PHA2		ParaHippocampal Area 2	Left	temporal lobe	HCP MMP 1.0
L_V4t		Area V4t	Left	occipital lobe	HCP MMP 1.0
L_FST		Area FST	Left	occipital lobe	HCP MMP 1.0
L_V3CD		Area V3CD	Left	occipital lobe	HCP MMP 1.0
L_LO3		Area Lateral Occipital 3	Left	occipital lobe	HCP MMP 1.0
L_VMV2		VentroMedial Visual Area 2	Left	occipital lobe	HCP MMP 1.0
L_31pd		Area 31pd	Left	posterior cingulate cortex, medial parietal lobe, and parieto-occipital sulcus	HCP MMP 1.0
L_31a		Area 31a	Left	posterior cingulate cortex, medial parietal lobe, and parieto-occipital sulcus	HCP MMP 1.0
L_VVC		Ventral Visual Complex	Left	occipital lobe	HCP MMP 1.0
L_pOFC		posterior OFC Complex	Left	medial frontal lobe, anterior cingulate gyrus, and orbitofrontal cortex	HCP MMP 1.0
L_PoI1		Area Posterior Insular 1	Left	insula and opercular cortex	HCP MMP 1.0
L_FOP5		Area Frontal Opercular 5	Left	insula and opercular cortex	HCP MMP 1.0
L_p47r		Area posterior 47r	Left	lateral frontal lobe	HCP MMP 1.0
L_TGv		Area TG Ventral	Left	temporal lobe	HCP MMP 1.0
L_MBelt		Medial Belt Complex	Left	insula and opercular cortex	HCP MMP 1.0
L_LBelt		Lateral Belt Complex	Left	insula and opercular cortex	HCP MMP 1.0
L_A4		Auditory 4 Complex	Left	insula and opercular cortex	HCP MMP 1.0
L_STSva		Area STSv anterior	Left	temporal lobe	HCP MMP 1.0
L_TE1m		Area TE1 Middle	Left	temporal lobe	HCP MMP 1.0
L_PI		Para-Insular Area	Left	insula and opercular cortex	HCP MMP 1.0
R_V1		Primary Visual Cortex	Right	occipital lobe	HCP MMP 1.0
R_V6		Sixth Visual Area	Right	occipital lobe	HCP MMP 1.0
R_V2		Second Visual Area	Right	occipital lobe	HCP MMP 1.0
R_V3		Third Visual Area	Right	occipital lobe	HCP MMP 1.0
R_V4		Fourth Visual Area	Right	occipital lobe	HCP MMP 1.0
R_V8		Eighth Visual Area	Right	occipital lobe	HCP MMP 1.0
R_4		Primary Motor Cortex	Right	motor, premotor, and somatosensory cortices	HCP MMP 1.0
R_V3A		Area V3A	Right	occipital lobe	HCP MMP 1.0
R_RSC		RetroSplenial Complex	Right	posterior cingulate cortex, medial parietal lobe, and parieto-occipital sulcus	HCP MMP 1.0
R_POS2		Parieto-Occipital Sulcus Area 2	Right	posterior cingulate cortex, medial parietal lobe, and parieto-occipital sulcus	HCP MMP 1.0
R_V7		Seventh Visual Area	Right	occipital lobe	HCP MMP 1.0
R_IPS1		IntraParietal Sulcus Area 1	Right	lateral parietal lobe	HCP MMP 1.0
R_FFC		Fusiform Face Complex	Right	occipital lobe	HCP MMP 1.0
R_V3B		Area V3B	Right	occipital lobe	HCP MMP 1.0
R_LO2		Area Lateral Occipital 2	Right	occipital lobe	HCP MMP 1.0
R_PIT		Posterior InferoTemporal Complex	Right	occipital lobe	HCP MMP 1.0
R_PCV		PreCuneus Visual Area	Right	posterior cingulate cortex, medial parietal lobe, and parieto-occipital sulcus	HCP MMP 1.0
R_7Pm		Medial Area 7P	Right	lateral parietal lobe	HCP MMP 1.0
R_7m		Area 7m	Right	posterior cingulate cortex, medial parietal lobe, and parieto-occipital sulcus	HCP MMP 1.0
R_POS1		Parieto-Occipital Sulcus Area 1	Right	posterior cingulate cortex, medial parietal lobe, and parieto-occipital sulcus	HCP MMP 1.0
R_5mv		Area 5m ventral	Right	motor, premotor, and somatosensory cortices	HCP MMP 1.0
R_5L		Area 5L	Right	motor, premotor, and somatosensory cortices	HCP MMP 1.0
R_24dd		Dorsal Area 24d	Right	anterior cingulate regions	HCP MMP 1.0
R_7AL		Lateral Area 7A	Right	lateral parietal lobe	HCP MMP 1.0
R_SCEF		Supplementary and Cingulate Eye Field	Right	medial frontal lobe, anterior cingulate gyrus, and orbitofrontal cortex	HCP MMP 1.0
R_6ma		Area 6m anterior	Right	motor, premotor, and somatosensory cortices	HCP MMP 1.0
R_7Pl		Lateral Area 7P	Right	lateral parietal lobe	HCP MMP 1.0
R_7PC		Area 7PC	Right	lateral parietal lobe	HCP MMP 1.0
R_LIPv		Area Lateral IntraParietal ventral	Right	lateral parietal lobe	HCP MMP 1.0
R_VIP		Ventral IntraParietal Complex	Right	lateral parietal lobe	HCP MMP 1.0
R_MIP		Medial IntraParietal Area	Right	lateral parietal lobe	HCP MMP 1.0
R_1		Area 1	Right	motor, premotor, and somatosensory cortices	HCP MMP 1.0
R_2		Area 2	Right	motor, premotor, and somatosensory cortices	HCP MMP 1.0
R_3a		Area 3a	Right	motor, premotor, and somatosensory cortices	HCP MMP 1.0
R_6mp		Area 6mp	Right	motor, premotor, and somatosensory cortices	HCP MMP 1.0
R_8C		Area 8C	Right	lateral frontal lobe	HCP MMP 1.0
R_LIPd		Area Lateral IntraParietal dorsal	Right	lateral parietal lobe	HCP MMP 1.0
R_6a		Area 6 anterior	Right	motor, premotor, and somatosensory cortices	HCP MMP 1.0
R_52		Area 52	Right	insula and opercular cortex	HCP MMP 1.0
R_Pir		Pirform Cortex	Right	insula and opercular cortex	HCP MMP 1.0
R_AIP		Anterior IntraParietal Area	Right	lateral parietal lobe	HCP MMP 1.0
R_ProS		ProStriate Area	Right	posterior cingulate cortex, medial parietal lobe, and parieto-occipital sulcus	HCP MMP 1.0
R_PBelt		ParaBelt Complex	Right	insula and opercular cortex	HCP MMP 1.0
R_PHA1		ParaHippocampal Area 1	Right	temporal lobe	HCP MMP 1.0
R_STSda		Area STSd anterior	Right	temporal lobe	HCP MMP 1.0
R_STSdp		Area STSd posterior	Right	temporal lobe	HCP MMP 1.0
R_STSvp		Area STSv posterior	Right	temporal lobe	HCP MMP 1.0
R_TGd		Area TG dorsal	Right	temporal lobe	HCP MMP 1.0
R_TE1p		Area TE1 posterior	Right	temporal lobe	HCP MMP 1.0
R_TE2a		Area TE2 anterior	Right	temporal lobe	HCP MMP 1.0
R_TF		Area TF	Right	temporal lobe	HCP MMP 1.0
R_TE2p		Area TE2 posterior	Right	temporal lobe	HCP MMP 1.0
R_PHT		Area PHT	Right	temporal lobe	HCP MMP 1.0
R_PH		Area PH	Right	occipital lobe	HCP MMP 1.0
R_TPOJ1		Area TemporoParietoOcci pital Junction 1	Right	lateral parietal lobe	HCP MMP 1.0
R_TPOJ3		Area TemporoParietoOcci pital Junction 3	Right	lateral parietal lobe	HCP MMP 1.0
R_DVT		Dorsal Transitional Visual Area	Right	posterior cingulate cortex, medial parietal lobe, and parieto-occipital sulcus	HCP MMP 1.0
R_IP1		Area IntraParietal 1	Right	lateral parietal lobe	HCP MMP 1.0
R_IP0		Area IntraParietal 0	Right	lateral parietal lobe	HCP MMP 1.0
R_PFm		Area PFm Complex	Right	lateral parietal lobe	HCP MMP 1.0
R_PGs		Area PGs	Right	lateral parietal lobe	HCP MMP 1.0
R_VMV1		VentroMedial Visual Area 1	Right	occipital lobe	HCP MMP 1.0
R_FST		Area FST	Right	occipital lobe	HCP MMP 1.0
R_V3CD		Area V3CD	Right	occipital lobe	HCP MMP 1.0
R_LO3		Area Lateral Occipital 3	Right	occipital lobe	HCP MMP 1.0
R_VMV2		VentroMedial Visual Area 2	Right	occipital lobe	HCP MMP 1.0
R_31a		Area 31a	Right	posterior cingulate cortex, medial parietal lobe, and parieto-occipital sulcus	HCP MMP 1.0
R_VVC		Ventral Visual Complex	Right	occipital lobe	HCP MMP 1.0
R_LBelt		Lateral Belt Complex	Right	insula and opercular cortex	HCP MMP 1.0
R_STSva		Area STSv anterior	Right	temporal lobe	HCP MMP 1.0
R_TE1m		Area TE1 Middle	Right	temporal lobe	HCP MMP 1.0
R_PI		Para-Insular Area	Right	insula and opercular cortex	HCP MMP 1.0
L_PEF		Premotor Eye Field	Left	motor, premotor, and somatosensory cortices	HCP MMP 1.0
L_23c		Area 23c	Left	posterior cingulate cortex, medial parietal lobe, and parieto-occipital sulcus	HCP MMP 1.0
L_6d		Dorsal area 6	Left	motor, premotor, and somatosensory cortices	HCP MMP 1.0
L_6mp		Area 6mp	Left	motor, premotor, and somatosensory cortices	HCP MMP 1.0
L_6v		Ventral Area 6	Left	motor, premotor, and somatosensory cortices	HCP MMP 1.0
L_p32pr		Area p32 prime	Left	anterior cingulate regions	HCP MMP 1.0
L_9-46d		Area 9-46d	Left	lateral frontal lobe	HCP MMP 1.0
L_43		Area 43	Left	insula and opercular cortex	HCP MMP 1.0
L_OP4		Area OP4/PV	Left	insula and opercular cortex	HCP MMP 1.0
L_FOP1		Frontal OPercular Area 1	Left	insula and opercular cortex	HCP MMP 1.0
L_Ig		Insular Granular Complex	Left	insula and opercular cortex	HCP MMP 1.0
L_p10p		Area posterior 10p	Left	lateral frontal lobe	HCP MMP 1.0
L_a32pr		Area anterior 32 prime	Left	anterior cingulate regions	HCP MMP 1.0
R_3b		Primary Sensory Cortex	Right	motor, premotor, and somatosensory cortices	HCP MMP 1.0
R_23d		Area 23d	Right	posterior cingulate cortex, medial parietal lobe, and parieto-occipital sulcus	HCP MMP 1.0
R_5m		Area 5m	Right	motor, premotor, and somatosensory cortices	HCP MMP 1.0
R_23c		Area 23c	Right	posterior cingulate cortex, medial parietal lobe, and parieto-occipital sulcus	HCP MMP 1.0
R_7Am		Medial Area 7A	Right	lateral parietal lobe	HCP MMP 1.0
R_s6-8		Superior 6-8 Transitional Area	Right	lateral frontal lobe	HCP MMP 1.0
R_IP2		Area IntraParietal 2	Right	lateral parietal lobe	HCP MMP 1.0
L_8BL		Area 8B Lateral	Left	lateral frontal lobe	HCP MMP 1.0
L_PFop		Area PF opercular	Left	lateral parietal lobe	HCP MMP 1.0
R_31pv		Area 31p ventral	Right	posterior cingulate cortex, medial parietal lobe, and parieto-occipital sulcus	HCP MMP 1.0
R_A5		Auditory 5 Complex	Right	insula and opercular cortex	HCP MMP 1.0
R_PHA3		ParaHippocampal Area 3	Right	temporal lobe	HCP MMP 1.0
R_PGp		Area PGp	Right	lateral parietal lobe	HCP MMP 1.0
R_PF		Area PF Complex	Right	lateral parietal lobe	HCP MMP 1.0
R_V4t		Area V4t	Right	occipital lobe	HCP MMP 1.0
R_31pd		Area 31pd	Right	posterior cingulate cortex, medial parietal lobe, and parieto-occipital sulcus	HCP MMP 1.0
L_p32		Area p32	Left	anterior cingulate regions	HCP MMP 1.0
R_MST		Medial Superior Temporal Area	Right	occipital lobe	HCP MMP 1.0
R_LO1		Area Lateral Occipital 1	Right	occipital lobe	HCP MMP 1.0
R_PSL		PeriSylvian Language Area	Right	insula and opercular cortex	HCP MMP 1.0
R_SFL		Superior Frontal Language Area	Right	motor, premotor, and somatosensory cortices	HCP MMP 1.0
R_d23ab		Area dorsal 23 a+b	Right	posterior cingulate cortex, medial parietal lobe, and parieto-occipital sulcus	HCP MMP 1.0
R_8Av		Area 8Av	Right	lateral frontal lobe	HCP MMP 1.0
R_RI		RetroInsular Cortex	Right	insula and opercular cortex	HCP MMP 1.0
R_TPOJ2		Area TemporoParietoOcci pital Junction 2	Right	lateral parietal lobe	HCP MMP 1.0
R_PoI1		Area Posterior Insular 1	Right	insula and opercular cortex	HCP MMP 1.0
R_TGv		Area TG Ventral	Right	temporal lobe	HCP MMP 1.0
R_MT		Middle Temporal Area	Right	occipital lobe	HCP MMP 1.0
R_STV		Superior Temporal Visual Area	Right	insula and opercular cortex	HCP MMP 1.0
R_v23ab		Area ventral 23 a+b	Right	posterior cingulate cortex, medial parietal lobe, and parieto-occipital sulcus	HCP MMP 1.0
R_24dv		Ventral Area 24d	Right	anterior cingulate regions	HCP MMP 1.0
R_i6-8		Inferior 6-8 Transitional Area	Right	lateral frontal lobe	HCP MMP 1.0
R_AAIC		Anterior Agranular Insula Complex	Right	insula and opercular cortex	HCP MMP 1.0
L_24dv		Ventral Area 24d	Left	anterior cingulate regions	HCP MMP 1.0
L_33pr		Area 33 prime	Left	anterior cingulate regions	HCP MMP 1.0
L_a24pr		Anterior 24 prime	Left	anterior cingulate regions	HCP MMP 1.0
R_6r		Rostral Area 6	Right	motor, premotor, and somatosensory cortices	HCP MMP 1.0
R_PGi		Area PGi	Right	lateral parietal lobe	HCP MMP 1.0
L_10v		Area 10v	Left	medial frontal lobe, anterior cingulate gyrus, and orbitofrontal cortex	HCP MMP 1.0
L_s32		Area s32	Left	anterior cingulate regions	HCP MMP 1.0
L_5m		Area 5m	Left	motor, premotor, and somatosensory cortices	HCP MMP 1.0
L_a24		Area a24	Left	anterior cingulate regions	HCP MMP 1.0
L_d32		Area dorsal 32	Left	anterior cingulate regions	HCP MMP 1.0
L_p9-46v		Area posterior 9-46v	Left	lateral frontal lobe	HCP MMP 1.0
L_p24		Area posterior 24	Left	anterior cingulate regions	HCP MMP 1.0
R_FEF		Frontal Eye Fields	Right	motor, premotor, and somatosensory cortices	HCP MMP 1.0
R_PEF		Premotor Eye Field	Right	motor, premotor, and somatosensory cortices	HCP MMP 1.0
R_55b		Area 55b	Right	motor, premotor, and somatosensory cortices	HCP MMP 1.0
R_6d		Dorsal area 6	Right	motor, premotor, and somatosensory cortices	HCP MMP 1.0
R_6v		Ventral Area 6	Right	motor, premotor, and somatosensory cortices	HCP MMP 1.0
R_p24pr		Area Posterior 24 prime	Right	anterior cingulate regions	HCP MMP 1.0
R_33pr		Area 33 prime	Right	anterior cingulate regions	HCP MMP 1.0
R_a24pr		Anterior 24 prime	Right	anterior cingulate regions	HCP MMP 1.0
R_p32pr		Area p32 prime	Right	anterior cingulate regions	HCP MMP 1.0
R_d32		Area dorsal 32	Right	anterior cingulate regions	HCP MMP 1.0
R_8BM		Area 8BM	Right	medial frontal lobe, anterior cingulate gyrus, and orbitofrontal cortex	HCP MMP 1.0
R_47m		Area 47m	Right	medial frontal lobe, anterior cingulate gyrus, and orbitofrontal cortex	HCP MMP 1.0
R_8Ad		Area 8Ad	Right	lateral frontal lobe	HCP MMP 1.0
R_9m		Area 9 Middle	Right	medial frontal lobe, anterior cingulate gyrus, and orbitofrontal cortex	HCP MMP 1.0
R_8BL		Area 8B Lateral	Right	lateral frontal lobe	HCP MMP 1.0
R_9p		Area 9 Posterior	Right	lateral frontal lobe	HCP MMP 1.0
R_44		Area 44	Right	lateral frontal lobe	HCP MMP 1.0
R_IFJa		Area IFJa	Right	lateral frontal lobe	HCP MMP 1.0
R_IFJp		Area IFJp	Right	lateral frontal lobe	HCP MMP 1.0
R_IFSp		Area IFSp	Right	lateral frontal lobe	HCP MMP 1.0
R_IFSa		Area IFSa	Right	lateral frontal lobe	HCP MMP 1.0
R_p9-46v		Area posterior 9-46v	Right	lateral frontal lobe	HCP MMP 1.0
R_46		Area 46	Right	lateral frontal lobe	HCP MMP 1.0
R_a9-46v		Area anterior 9-46v	Right	lateral frontal lobe	HCP MMP 1.0
R_9-46d		Area 9-46d	Right	lateral frontal lobe	HCP MMP 1.0
R_43		Area 43	Right	insula and opercular cortex	HCP MMP 1.0
R_OP4		Area OP4/PV	Right	insula and opercular cortex	HCP MMP 1.0
R_PoI2		Posterior Insular Area 2	Right	insula and opercular cortex	HCP MMP 1.0
R_FOP4		Frontal OPercular Area 4	Right	insula and opercular cortex	HCP MMP 1.0
R_MI		Middle Insular Area	Right	insula and opercular cortex	HCP MMP 1.0
R_FOP1		Frontal OPercular Area 1	Right	insula and opercular cortex	HCP MMP 1.0
R_FOP3		Frontal OPercular Area 3	Right	insula and opercular cortex	HCP MMP 1.0
R_FOP2		Frontal OPercular Area 2	Right	insula and opercular cortex	HCP MMP 1.0
R_PFop		Area PF opercular	Right	lateral parietal lobe	HCP MMP 1.0
R_FOP5		Area Frontal Opercular 5	Right	insula and opercular cortex	HCP MMP 1.0
R_p47r		Area posterior 47r	Right	lateral frontal lobe	HCP MMP 1.0
R_a32pr		Area anterior 32 prime	Right	anterior cingulate regions	HCP MMP 1.0
R_OP2-3		Area OP2-3/VS	Right	insula and opercular cortex	HCP MMP 1.0
R_PFcm		Area PFcm	Right	insula and opercular cortex	HCP MMP 1.0
R_PFt		Area PFt	Right	lateral parietal lobe	HCP MMP 1.0
R_p10p		Area posterior 10p	Right	lateral frontal lobe	HCP MMP 1.0
R_A1		Primary Auditory Cortex	Right	insula and opercular cortex	HCP MMP 1.0
R_9a		Area 9 anterior	Right	lateral frontal lobe	HCP MMP 1.0
R_AVI		Anterior Ventral Insular Area	Right	insula and opercular cortex	HCP MMP 1.0
R_a47r		Area anterior 47r	Right	lateral frontal lobe	HCP MMP 1.0
R_a24		Area a24	Right	anterior cingulate regions	HCP MMP 1.0
R_TE1a		Area TE1 anterior	Right	temporal lobe	HCP MMP 1.0
L_25		Area 25	Left	anterior cingulate regions	HCP MMP 1.0
R_p32		Area p32	Right	anterior cingulate regions	HCP MMP 1.0
R_10d		Area 10d	Right	lateral frontal lobe	HCP MMP 1.0
R_OP1		Area OP1/SII	Right	insula and opercular cortex	HCP MMP 1.0
R_TA2		Area TA2	Right	insula and opercular cortex	HCP MMP 1.0
R_EC		Entorhinal Cortex	Right	temporal lobe	HCP MMP 1.0
R_PreS		PreSubiculum	Right	temporal lobe	HCP MMP 1.0
R_Ig		Insular Granular Complex	Right	insula and opercular cortex	HCP MMP 1.0
R_MBelt		Medial Belt Complex	Right	insula and opercular cortex	HCP MMP 1.0
R_A4		Auditory 4 Complex	Right	insula and opercular cortex	HCP MMP 1.0
R_VMV3		VentroMedial Visual Area 3	Right	occipital lobe	HCP MMP 1.0
R_11l		Area 11l	Right	medial frontal lobe, anterior cingulate gyrus, and orbitofrontal cortex	HCP MMP 1.0
R_13l		Area 13l	Right	medial frontal lobe, anterior cingulate gyrus, and orbitofrontal cortex	HCP MMP 1.0
R_PHA2		ParaHippocampal Area 2	Right	temporal lobe	HCP MMP 1.0
R_45		Area 45	Right	lateral frontal lobe	HCP MMP 1.0
R_47l		Area 47l (47 lateral)	Right	lateral frontal lobe	HCP MMP 1.0
R_a10p		Area anterior 10p	Right	lateral frontal lobe	HCP MMP 1.0
R_10pp		Polar 10p	Right	lateral frontal lobe	HCP MMP 1.0
R_OFC		Orbital Frontal Complex	Right	medial frontal lobe, anterior cingulate gyrus, and orbitofrontal cortex	HCP MMP 1.0
R_25		Area 25	Right	anterior cingulate regions	HCP MMP 1.0
R_p24		Area posterior 24	Right	anterior cingulate regions	HCP MMP 1.0
R_PeEc		Perirhinal Ectorhinal Cortex	Right	temporal lobe	HCP MMP 1.0
R_s32		Area s32	Right	anterior cingulate regions	HCP MMP 1.0
R_H		Hippocampus	Right	temporal lobe	HCP MMP 1.0
R_10r		Area 10r	Right	medial frontal lobe, anterior cingulate gyrus, and orbitofrontal cortex	HCP MMP 1.0
R_STGa		Area STGa	Right	insula and opercular cortex	HCP MMP 1.0
R_10v		Area 10v	Right	medial frontal lobe, anterior cingulate gyrus, and orbitofrontal cortex	HCP MMP 1.0
R_pOFC		posterior OFC Complex	Right	medial frontal lobe, anterior cingulate gyrus, and orbitofrontal cortex	HCP MMP 1.0
R_47s		Area 47s	Right	lateral frontal lobe	HCP MMP 1.0
